# Supplementary material for: Acceptance of Driverless Vehicles: Results from a Large Cross-National Questionnaire Study
Source: Hindawi journal article supplement (doi:10.1155/2018/5382192), 2018-01-01
Supplement: f1 [file 5382192.f1.zip]

# User Acceptance Of Driverless Vehicles

## Instructions ▲

You are invited to participate in a survey entitled **User Acceptance of Driverless Vehicles**.

The survey is being conducted by Sina Nordhoff, PhD researcher, Department of Transport & Planning, Delft University of Technology, The Netherlands.

s.nordhoff@tudelft.nl (mailto:s.nordhoff@tudelft.nl)

Before starting, please read the instructions below carefully and refer to this page if needed.

Automated vehicles are now being extensively tested on public roads by auto builders, suppliers and software companies. These vehicles still have steering wheel and pedals, and require a qualified driver to monitor the automation and to take back control when needed. **This questionnaire is about the next level of automation being driverless vehicles.** Driverless vehicles operate without a driver and do not have a steering wheel, gas or brake pedals. In the beginning, they will not operate on all roads and not in all traffic situations. With this survey, I would like to find out what do you think about these driverless vehicles and whether you would be ready and willing to accept and use them.

Imagine that a driverless vehicle is waiting for you outside the train station or some other public transport stop (e.g. bus, tram, metro) to drive you to your final destination, providing last-mile transport. It can also drive you back to your original destination. The driverless vehicle is 100% electric. You may also book it on-demand via your smartphone-app. When you enter the vehicle, you may need to give in your destination via an interface –for example a keyboard – so that the vehicle knows where you would like to go. As the vehicle can accommodate 6-8 passengers, it may be the case that you share the vehicle with a few unknown travelers having the same destination like you. The pictures below show the interior and exterior of such a driverless vehicle.

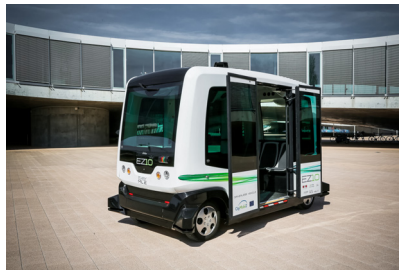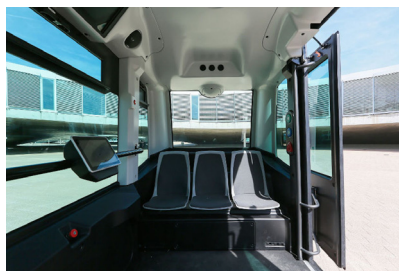

## Formal guidelines:

- Investigator of study can be contacted on above-email address to discuss study
- You must be at least 18 years old to participate
- Survey length: approximately 20 min.
- No personally identifiable information (such as name or address) will be collected from you.
- Participation is voluntary
- If you would not like to participate, then please close this page
- You may skip any question you do not want to answer, and you may stop at any time

**And now: Have fun!**

## Have you read and understood the above instructions? (required)

- ☐ Yes
- ☐ No

## The definitions given in the instructions are clear to me. (required)

- ☐ Disagree strongly
- ☐ Disagree moderately
- ☐ Disagree slightly
- ☐ Agree slightly
- ☐ Agree moderately
- ☐ Agree strongly
- ☐ I prefer not to respond

The first section asks you to provide some personal information. No personally identifiable information will be collected from you.

**What is your gender? (required)**

- ☐ Male
- ☐ Female
- ☐ I prefer not to respond

**Please indicate your year of birth. (required)**

**In which country do you live now? (required)**

**And in which city? (required)**

**Which of the following possibilities describe your current residential situation the most? (required)**

- ☐ Outside of the city in a house in the countryside
- ☐ In a house on the city outskirts
- ☐ Within the city, but outside the city centre in a purely residential area
- ☐ In an apartment in the immediate city centre
- ☐ I prefer not to respond

If you include yourself, how many people in your household are...?

**... over 18 years (required)**

**...14 to 17 years old (required)**

**...6 to 13 years old (required)**

**...younger than 6 years old (required)**

☐ Apart from me, no other people live in my household

☐ I prefer not to respond

**How many miles do you live away from your workplace, training post or school? Please note: 1 mile= 1,60934 km.**

**What is the highest educational qualification that you have? (required)**

- ☐ Primary school/elementary school without completed education
- ☐ Primary school/ elementary school with a completed education
- ☐ Secondary/technical/business school without school leaving examination
- ☐ School leaving examination/qualification
- ☐ Completed academic studies (university, technical college, academy)
- ☐ No qualifications
- ☐ I am still student
- ☐ I prefer not to respond

**Other, please specify:**

**Please indicate your labour status. (required)**

- ☐ Pupil, student, apprentice
- ☐ Paternal or maternal leave
- ☐ Exclusively housekeeping
- ☐ Retired
- ☐ Seeking employment
- ☐ Half-time employment (less than 11 hours a week)
- ☐ Half-time employment (11 up to 35 hours a week)
- ☐ Full-time employment (more than 35 hours a week)
- ☐ I prefer not to respond

**Other, please specify:**

**Please indicate the net income of your household per month. This includes the entire income of all persons belonging to your household including wages, salaries and other remuneration, self-employment income, pension, benefits for unemployment, housing and childcare etc. without taxes and social security contributions. (required)**

- ☐ Below 1000\$ per month (Below 878,90€)
- ☐ 1.000\$ up to 1.599\$ per month (878,90€-1406,83€)
- ☐ 1.600\$ up to 2.899\$ per month (1.407,83€-2.551,15€)
- ☐ 2.900\$ up to 3.999\$ per month (2.551,81€-3518,54€)
- ☐ 4.000\$ up to 5.000\$ (3.522,21€-4.401,80€)
- ☐ More than 5.000\$ per month (More than 4.401,80€ per month)
- ☐ I prefer not to respond

**Do you have a valid driver's license? (required)**

- ☐ Yes
- ☐ No
- ☐ I prefer not to respond

**Do you have, or have you ever had, any physical disability or long-term health problems? (required)**

- ☐ No known disability
- ☐ Physical impairment
- ☐ Visual impairment
- ☐ I prefer not to respond

**How many vehicles do you have in your household? (required)**

- ☐ 0
- ☐ 1
- ☐ 2
- ☐ 3
- ☐ More than 3
- ☐ I prefer not to respond

**How difficult is it usually to find a parking space? (required)**

- ☐ Very difficult
- ☐ Rather difficult
- ☐ Not too difficult
- ☐ Not at all difficult
- ☐ Do not own or use vehicle
- ☐ I prefer not to respond

**How many miles do you estimate to travel per year in a vehicle, regardless of whether as a driver or passenger? Please note: 1 mile= 1,60934 km. (required)**

**In how many accidents were you involved in when driving a vehicle in the last 3 years? Please indicate all accidents, regardless of how they were caused, how severe they were, or where they happened. (required)**

- ☐ 0
- ☐ 1
- ☐ 2
- ☐ 3
- ☐ 4
- ☐ 5
- ☐ More than 5
- ☐ I prefer not to respond

**Do you have a monthly pass or an annual travel card for public transport? (required)**

- ☐ Yes
- ☐ No
- ☐ I prefer not to respond

**How many minutes does it or would it take you by foot from your home to the nearest public transport stop? (required)**

- ☐ Less than 5 minutes
- ☐ Between 5 to 10 minutes
- ☐ Between 10 to 20 minutes
- ☐ Between 20 to 30 minutes
- ☐ More than 30 minutes
- ☐ Not walkable
- ☐ I prefer not to respond

**In how many carsharing organizations are you a member? (required)**

- ☐ 0
- ☐ 1
- ☐ 2
- ☐ More than 2
- ☐ I prefer not to respond

How often do you use the following transport modes?

**Walking for more than 500 meters per trip (required)**

- ☐ Daily or almost daily
- ☐ On one to three days per week
- ☐ On one to three days per month
- ☐ Less than monthly or
- ☐ Never or almost never
- ☐ I prefer not to respond

**Cycling (required)**

- ☐ Daily or almost daily
- ☐ On one to three days per week
- ☐ On one to three days per month
- ☐ Less than monthly or
- ☐ Never or almost never
- ☐ I prefer not to respond

**Moped or motorcycle as a driver (required)**

- ☐ Daily or almost daily
- ☐ On one to three days per week
- ☐ On one to three days per month
- ☐ Less than monthly or
- ☐ Never or almost never
- ☐ I prefer not to respond

**Conventional vehicle, as a driver or passenger (required)**

- ☐ Daily or almost daily
- ☐ On one to three days per week
- ☐ On one to three days per month
- ☐ Less than monthly or
- ☐ Never or almost never
- ☐ I prefer not to respond

**Public transport for trips of less than 100 km per one-way (regional trains, subways, trams, busses) (required)**

- ☐ Daily or almost daily
- ☐ On one to three days per week
- ☐ On one to three days per month
- ☐ Less than monthly or
- ☐ Never or almost never
- ☐ I prefer not to respond

**Public transport for trips of more than 100 km per one-way (required)**

- ☐ Daily or almost daily
- ☐ On one to three days per week
- ☐ On one to three days per month
- ☐ Less than monthly or
- ☐ Never or almost never
- ☐ I prefer not to respond

**Other, please specify:**

Please tell us your opinion on a number of different means of transport. (If you come across a means of transport that you do not use yourself, please just state your general attitude towards it).

**I can organize my day flexibly with public transport. (required)**

- ☐ Disagree strongly
- ☐ Disagree moderately
- ☐ Disagree slightly
- ☐ Agree slightly
- ☐ Agree moderately
- ☐ Agree strongly
- ☐ I prefer not to respond

**I need a vehicle in order to be flexible. (required)**

- ☐ Disagree strongly
- ☐ Disagree moderately
- ☐ Disagree slightly
- ☐ Agree slightly
- ☐ Agree moderately
- ☐ Agree strongly
- ☐ I prefer not to respond

**Driving is especially fun for me. (required)**

- ☐ Disagree strongly
- ☐ Disagree moderately
- ☐ Disagree slightly
- ☐ Agree slightly
- ☐ Agree moderately
- ☐ Agree strongly
- ☐ I prefer not to respond

**I am satisfied with the possibilities available to cover my daily travel needs. (required)**

- ☐ Disagree strongly
- ☐ Disagree moderately
- ☐ Disagree slightly
- ☐ Agree slightly
- ☐ Agree moderately
- ☐ Agree strongly
- ☐ I prefer not to respond

Please indicate why you would use a driverless vehicle. Please select only three of the most relevant options to you.

**I would use a driverless vehicle... (required)**

- ☐ when I am impaired by alcohol, fatigue or medication
- ☐ because I could spend time on other activities such as surfing on the Internet
- ☐ because it does not produce pollutant emissions
- ☐ to pick up my kids from school or bring them to soccer practice
- ☐ because it is safer than the average human driver
- ☐ because I would not need to search for a parking space anymore
- ☐ because traffic congestion would be reduced
- ☐ because it would consume less fuel
- ☐ because it would be environmentally friendlier
- ☐ I would not take a ride in a driverless vehicle
- ☐ I prefer not to respond

**Other, please specify:**

In a driverless vehicle, driving is done by an on-board computer. This means that you would have time for other activities.

**Which activities would you like to pursue in a driverless vehicle? Please select five of the most relevant options to you. (required)**

- ☐ Reading a book, magazine or newspaper
- ☐ Phoning
- ☐ Surfing on the internet
- ☐ Social networking via social media, SMS, mail or phone
- ☐ Listening to music/radio
- ☐ Working on a laptop or tablet
- ☐ Looking out of the window
- ☐ Chatting with passengers
- ☐ Eating/drinking
- ☐ Watching movies
- ☐ Concentrating on the trip/route
- ☐ Resting/sleeping
- ☐ I prefer not to respond

**Other, please specify:**

And for which travel purposes would you use a driverless vehicle?

**For which travel purposes would you use a driverless vehicle? Please select one or more than one option. (required)**

- ☐ School/study
- ☐ Commuting to and from work

- ☐ Business trips (business meetings not located at company headquarters)
- ☐ Leisure
- ☐ Running errands
- ☐ Pick-up and delivery service
- ☐ I would not use a driverless vehicle
- ☐ I prefer not to respond

**Other, please specify:**

With the next few questions, I would like to know which features driverless vehicles should or should not have according to your opinion.

**Please indicate which features or characteristics you would find attractive in driverless vehicles. Please select only three of the most relevant options to you. (required)**

- ☐ Button to stop the vehicle
- ☐ Ability to connect smartphone or other mobile device to the internet
- ☐ Steering wheel, gas or brake pedals
- ☐ Infotainment
- ☐ Electric propulsion
- ☐ Place for luggage
- ☐ Hotline that can be called in case of questions
- ☐ Ability to steer vehicle manually
- ☐ Wheelchair ramp
- ☐ I prefer not to respond

**Other, please specify:**

**I would like to have a button inside the driverless vehicle which I can press to stop it. (required)**

- ☐ Disagree strongly
- ☐ Disagree moderately
- ☐ Disagree slightly
- ☐ Agree slightly
- ☐ Agree moderately
- ☐ Agree strongly
- ☐ I prefer not to respond

**I think I would enjoy taking a ride in a driverless vehicle. (required)**

- ☐ Disagree strongly
- ☐ Disagree moderately
- ☐ Disagree slightly
- ☐ Agree slightly
- ☐ Agree moderately
- ☐ Agree strongly
- ☐ I prefer not to respond

**I would use a driverless vehicle that is 100% electric. (required)**

- ☐ Disagree strongly
- ☐ Disagree moderately
- ☐ Disagree slightly
- ☐ Agree slightly
- ☐ Agree moderately
- ☐ Agree strongly
- ☐ I prefer not to respond

**I would find it important that driverless vehicles are aesthetic in terms of styling and design. (required)**

- ☐ Disagree strongly
- ☐ Disagree moderately
- ☐ Disagree slightly
- ☐ Agree slightly
- ☐ Agree moderately
- ☐ Agree strongly
- ☐ I prefer not to respond

**I would share a driverless vehicle with around 6-8 fellow travelers who have the same route like me. (required)**

- ☐ Disagree strongly
- ☐ Disagree moderately
- ☐ Disagree slightly
- ☐ Agree slightly
- ☐ Agree moderately

- ☐ Agree strongly
- ☐ I prefer not to respond

**Please indicate how often you intend to use a driverless vehicle when it is available on the market. (required)**

- ☐ Daily or almost daily
- ☐ On one to three days per week
- ☐ On one to three days per month
- ☐ Less than monthly or
- ☐ Never or almost never
- ☐ I prefer not to respond

**Driverless vehicles would take away the driving pleasure or enjoyment. (required)**

- ☐ Disagree strongly
- ☐ Disagree moderately
- ☐ Disagree slightly
- ☐ Agree slightly
- ☐ Agree moderately
- ☐ Agree strongly
- ☐ I prefer not to respond

**I would use a 100% electric driverless vehicle from the train station or some other public transport stop to my final destination or vice versa. (required)**

- ☐ Disagree strongly
- ☐ Disagree moderately
- ☐ Disagree slightly
- ☐ Agree slightly
- ☐ Agree moderately
- ☐ Agree strongly
- ☐ I prefer not to respond

**I would feel comfortable in a vehicle without a steering wheel, gas or brake pedals. (required)**

- ☐ Disagree strongly
- ☐ Disagree moderately
- ☐ Disagree slightly
- ☐ Agree slightly
- ☐ Agree moderately
- ☐ Agree strongly
- ☐ I prefer not to respond

With the next question, I would like to get your ideas on how driverless vehicles should be operated. Please select three of the most relevant options.

**I would use a driverless vehicle that ... (required)**

- ☐ operates on a fixed schedule
- ☐ supplies a direct, non-stop connection to my final destination
- ☐ stops in front of my destination
- ☐ I can book on-demand via smartphone-app
- ☐ is clean after its previous use
- ☐ is available within a reasonable amount of time
- ☐ arrives in time at my destination
- ☐ I prefer not to respond

**Other, please specify:**

With the next few questions, I would like to know which level of automation or control you would prefer in a driverless vehicle.

**Do you have experience with the following types of vehicle automation? (required)**

- ☐ Cruise Control (maintaining a preset speed)
- ☐ Adaptive Cruise Control (maintaining preset speed and ensuring safe distance)
- ☐ Lane Departure Warning (warning driver when vehicle starts deviating from its lane) or Lane Keeping Assistance (helping the vehicle to stay near centre of the lane)
- ☐ Automated Emergency Braking (intervening when the driver does not brake in time)
- ☐ Traffic Jam Assist (allowing hands free driving at low speed)
- ☐ I prefer not to respond

**Other, please specify:**

**An external control room may monitor the operations of the driverless vehicle for safety reasons. No private data will be collected from you. Would you mind being transported by a driverless vehicle that is supervised by an external control room? (required)**

- ☐ Yes
- ☐ No
- ☐ I prefer not to respond

**Driverless vehicles can operate without human supervision. Would you still prefer having some level of supervision? (required)**

- ☐ No human supervision
- ☐ Remote human supervision from a control room
- ☐ Supervision by a steward on board
- ☐ I prefer not to respond

**I would like to take over control from the driverless vehicle when I want this. (required)**

- ☐ Disagree strongly
- ☐ Disagree moderately
- ☐ Disagree slightly
- ☐ Agree slightly
- ☐ Agree moderately
- ☐ Agree strongly
- ☐ I prefer not to respond

**If it were affordable, I would use a driverless vehicle. (required)**

- ☐ Disagree strongly
- ☐ Disagree moderately
- ☐ Disagree slightly
- ☐ Agree slightly
- ☐ Agree moderately
- ☐ Agree strongly
- ☐ I prefer not to respond

In this section, I would like to know whether you think driverless vehicles are of use to you compared to your daily travel mode.

**I would use a driverless vehicle for my daily travel because it would be better and more convenient than my existing form of travel. (required)**

- ☐ Disagree strongly
- ☐ Disagree moderately
- ☐ Disagree slightly
- ☐ Agree slightly
- ☐ Agree moderately
- ☐ Agree strongly
- ☐ I prefer not to respond

**I think driverless vehicles would be easier to use than my existing form of travel. (required)**

- ☐ Disagree strongly
- ☐ Disagree moderately
- ☐ Disagree slightly
- ☐ Agree slightly
- ☐ Agree moderately
- ☐ Agree strongly
- ☐ I prefer not to respond

**Even if it were more expensive than my existing form of travel, I would prefer driverless vehicles to my existing form of travel. (required)**

- ☐ Disagree strongly
- ☐ Disagree moderately
- ☐ Disagree slightly
- ☐ Agree slightly
- ☐ Agree moderately
- ☐ Agree strongly
- ☐ I prefer not to respond

**I think that learning to operate a driverless vehicle would be easy for me. (required)**

- ☐ Disagree strongly
- ☐ Disagree moderately
- ☐ Disagree slightly
- ☐ Agree slightly
- ☐ Agree moderately
- ☐ Agree strongly
- ☐ I prefer not to respond

**I think that a driverless vehicle would be more useful than my existing form of travel. (required)**

- ☐ Disagree strongly



- ☐ Disagree moderately
- ☐ Disagree slightly
- ☐ Agree slightly
- ☐ Agree moderately
- ☐ Agree strongly
- ☐ I prefer not to respond

**Please indicate when you would use a driverless vehicle. Please select only the most relevant option to you. (required)**

- ☐ When it is used by less than 5 % of the people
- ☐ When it is used by 20% to 40% of the people
- ☐ When it is used by 50% to 60% of the people
- ☐ When it is used by 70% to 90% of the people
- ☐ When it is used by 95% to 100% of the people
- ☐ Never
- ☐ I prefer not to respond

**Please indicate under which financial condition you would like to use a driverless vehicle. Please select only the most relevant option to you. (required)**

- ☐ I would only use a driverless vehicle under the condition of a fair price.
- ☐ I would only use a driverless vehicle if I would pay less than for my existing form of travel.
- ☐ I would only use a driverless vehicle if its use is for free.
- ☐ I would only use a driverless vehicle if subsidied by the government.
- ☐ Never

Would you feel comfortable in a driverless vehicle?

**I trust that a driverless vehicle can drive without assistance from me. (required)**

- ☐ Disagree strongly
- ☐ Disagree moderately
- ☐ Disagree slightly
- ☐ Agree slightly
- ☐ Agree moderately
- ☐ Agree strongly
- ☐ I prefer not to respond

**I would feel uncomfortable entrusting the safety of a close family member to a driverless vehicle. (required)**

- ☐ Disagree strongly
- ☐ Disagree moderately
- ☐ Disagree slightly
- ☐ Agree slightly
- ☐ Agree moderately
- ☐ Agree strongly
- ☐ I prefer not to respond

**I trust the driverless vehicle to be safe and reliable in severe weather conditions, such as heavy rain, fog or snow. (required)**

- ☐ Disagree strongly
- ☐ Disagree moderately
- ☐ Disagree slightly
- ☐ Agree slightly
- ☐ Agree moderately
- ☐ Agree strongly
- ☐ I prefer not to respond

**I would not use a driverless vehicle because technology can sometimes fail. (required)**

- ☐ Disagree strongly
- ☐ Disagree moderately
- ☐ Disagree slightly
- ☐ Agree slightly
- ☐ Agree moderately
- ☐ Agree strongly
- ☐ I prefer not to respond

The following set of questions describes a number of personality characteristics that may or may not apply to you. Please indicate to which extent you agree or disagree with the following statements.

**I would like to have my friends or family or other important people to me adopt the driverless vehicle before I do. (required)**

- ☐ Disagree strongly
- ☐ Disagree moderately
- ☐ Disagree slightly
- ☐ Agree slightly
- ☐ Agree moderately

- ☐ Agree strongly
- ☐ I prefer not to respond

**I prefer to keep a physical distance between myself and strangers. (required)**

- ☐ Disagree strongly
- ☐ Disagree moderately
- ☐ Disagree slightly
- ☐ Agree slightly
- ☐ Agree moderately
- ☐ Agree strongly
- ☐ I prefer not to respond

**Environmental protection is crucial for me in my choice of transportation. (required)**

- ☐ Disagree strongly
- ☐ Disagree moderately
- ☐ Disagree slightly
- ☐ Agree slightly
- ☐ Agree moderately
- ☐ Agree strongly
- ☐ I prefer not to respond

**People who are important to me would like it when I would use a driverless vehicle. (required)**

- ☐ Disagree strongly
- ☐ Disagree moderately
- ☐ Disagree slightly
- ☐ Agree slightly
- ☐ Agree moderately
- ☐ Agree strongly
- ☐ I prefer not to respond

**I would trust the driving skills of a driverless vehicle more than my own driving skills. (required)**

- ☐ Disagree strongly
- ☐ Disagree moderately
- ☐ Disagree slightly
- ☐ Agree slightly
- ☐ Agree moderately
- ☐ Agree strongly
- ☐ I prefer not to respond

**There will always be accidents, even with driverless vehicles on the road. (required)**

- ☐ Disagree strongly
- ☐ Disagree moderately
- ☐ Disagree slightly
- ☐ Agree slightly
- ☐ Agree moderately
- ☐ Agree strongly
- ☐ I prefer not to respond

**I often feel like being a racing driver when driving manually. (required)**

- ☐ Disagree strongly
- ☐ Disagree moderately
- ☐ Disagree slightly
- ☐ Agree slightly
- ☐ Agree moderately
- ☐ Agree strongly
- ☐ I prefer not to respond

**Driving without accidents is mainly a matter of luck. (required)**

- ☐ Disagree strongly
- ☐ Disagree moderately
- ☐ Disagree slightly
- ☐ Agree slightly
- ☐ Agree moderately
- ☐ Agree strongly
- ☐ I prefer not to respond

**When a driver is involved in an accident, it is because he or she did not drive properly. (required)**

- ☐ Disagree strongly
- ☐ Disagree moderately
- ☐ Disagree slightly

- ☐ Agree slightly
- ☐ Agree moderately
- ☐ Agree strongly
- ☐ I prefer not to respond

**I would like to learn to drive vehicles that can exceed the speed of 300 km/h. (required)**

- ☐ Disagree strongly
- ☐ Disagree moderately
- ☐ Disagree slightly
- ☐ Agree slightly
- ☐ Agree moderately
- ☐ Agree strongly
- ☐ I prefer not to respond

**A careful driver can prevent any accident on the road. (required)**

- ☐ Disagree strongly
- ☐ Disagree moderately
- ☐ Disagree slightly
- ☐ Agree slightly
- ☐ Agree moderately
- ☐ Agree strongly
- ☐ I prefer not to respond

Motion sickness is sickness due to motion, marked by symptoms of nausea, dizziness, and other physical discomfort, more often experienced by passengers than drivers.

**Please indicate how often you experience motion sickness in a moving conventional vehicle or when taking public transport means. (required)**

- ☐ Very Frequently
- ☐ Frequently
- ☐ Occasionally
- ☐ Rarely
- ☐ Very rarely
- ☐ Never
- ☐ I prefer not to respond

**Please indicate the severity of motion sickness you experience in a moving conventional vehicle or when taking public transport means. (required)**

- ☐ Moderate
- ☐ Severe
- ☐ I do not experience motion sickness
- ☐ I prefer not to respond

What is your own personal perspective on the following statements regarding technical innovations?

**My friends and acquaintances often ask for my advice, when they have a technical problem. (required)**

- ☐ Disagree strongly
- ☐ Disagree moderately
- ☐ Disagree slightly
- ☐ Agree slightly
- ☐ Agree moderately
- ☐ Agree strongly
- ☐ I prefer not to respond

**I rapidly and intuitively learn to handle unfamiliar electronic devices. (required)**

- ☐ Disagree strongly
- ☐ Disagree moderately
- ☐ Disagree slightly
- ☐ Agree slightly
- ☐ Agree moderately
- ☐ Agree strongly
- ☐ I prefer not to respond

**It is fun for me to use an electronic device. (required)**

- ☐ Disagree strongly
- ☐ Disagree moderately
- ☐ Disagree slightly
- ☐ Agree slightly
- ☐ Agree moderately
- ☐ Agree strongly
- ☐ I prefer not to respond

What is your own personal perspective on the following statements regarding mobility-related innovations?

**I often think about how mobility in my city could be improved. (required)**

- ☐ Disagree strongly
- ☐ Disagree moderately
- ☐ Disagree slightly
- ☐ Agree slightly
- ☐ Agree moderately
- ☐ Agree strongly
- ☐ I prefer not to respond

**My friends and acquaintances often consult me on questions regarding mobility or travel options. (required)**

- ☐ Disagree strongly
- ☐ Disagree moderately
- ☐ Disagree slightly
- ☐ Agree slightly
- ☐ Agree moderately
- ☐ Agree strongly
- ☐ I prefer not to respond

**I am often the first to make other people aware of new options for their own mobility. (required)**

- ☐ Disagree strongly
- ☐ Disagree moderately
- ☐ Disagree slightly
- ☐ Agree slightly
- ☐ Agree moderately
- ☐ Agree strongly
- ☐ I prefer not to respond

**I often provide others with information regarding their mobility options. (required)**

- ☐ Disagree strongly
- ☐ Disagree moderately
- ☐ Disagree slightly
- ☐ Agree slightly
- ☐ Agree moderately
- ☐ Agree strongly
- ☐ I prefer not to respond

Can you think of any potential problems or concerns that would discourage you from using or buying a driverless vehicle? Please select all that apply.

**What are potential factors or concerns that may discourage you from riding in a driverless vehicle? Please select only the five most relevant options to you. (required)**

- ☐ The prohibition of manual driving
- ☐ The loss of the joy of driving and the feeling of being in control
- ☐ Unemployment because some jobs will be replaced by driverless vehicles
- ☐ Traveler's privacy disclosure
- ☐ Affordability
- ☐ Motion sickness
- ☐ Equipment or system failure
- ☐ Legal liability for drivers or owners
- ☐ Interactions with conventional vehicles
- ☐ Hacking the vehicle's computer systems
- ☐ Learning to use them
- ☐ There is no reason why I would not ride in a driverless vehicle
- ☐ I prefer not to respond

**Other, please specify:**

Now I would like to get your ideas on driverless vehicles that can drive anywhere, on every road and in every traffic situation. I refer to these vehicles as self-driving vehicles. How do you envision the future with these self-driving vehicles?

**I would like to buy a self-driving vehicle (assuming a price similar to a normal vehicle today). (required)**

- ☐ Disagree strongly
- ☐ Disagree moderately
- ☐ Disagree slightly
- ☐ Agree slightly
- ☐ Agree moderately
- ☐ Agree strongly
- ☐ I prefer not to respond

**I would like to use self-driving vehicles together with other passengers as a part of public transport. (required)**

- ☐ Disagree strongly
- ☐ Disagree moderately
- ☐ Disagree slightly
- ☐ Agree slightly
- ☐ Agree moderately
- ☐ Agree strongly
- ☐ I prefer not to respond

**I would like to use self-driving vehicles in a carsharing scheme. (required)**

- ☐ Disagree strongly
- ☐ Disagree moderately
- ☐ Disagree slightly
- ☐ Agree slightly
- ☐ Agree moderately
- ☐ Agree strongly
- ☐ I prefer not to respond

**Self-driving vehicles will be legally accepted as independent drivers (so that no human driver will need to be onboard). (required)**

- ☐ Disagree strongly
- ☐ Disagree moderately
- ☐ Disagree slightly
- ☐ Agree slightly
- ☐ Agree moderately
- ☐ Agree strongly
- ☐ I prefer not to respond

Please tell us for each possible development whether you think that this development is probable or not.

**Self-driving vehicles will mostly be shared vehicles. (required)**

- ☐ Unlikely
- ☐ Rather unlikely
- ☐ Rather probable
- ☐ Probable
- ☐ I don't know
- ☐ I prefer not to respond

**Self-driving vehicles will mostly be privately owned. (required)**

- ☐ Unlikely
- ☐ Rather unlikely
- ☐ Rather probable
- ☐ Probable
- ☐ I don't know
- ☐ I prefer not to respond

**Self-driving vehicles will be a normal part of everyday mobility. (required)**

- ☐ Unlikely
- ☐ Rather unlikely
- ☐ Rather probable
- ☐ Probable
- ☐ I don't know
- ☐ I prefer not to respond

Imagine that in the future a single mobility flat-rate will allow users to use a broad range of mobility services (public transport, car- and bikesharing etc.) in cities. Please indicate to what extent you agree or disagree with the following statement.

**I would like to use a mobility flat-rate for all mobility services in my city. (required)**

- ☐ Disagree strongly
- ☐ Disagree moderately
- ☐ Disagree slightly
- ☐ Agree slightly
- ☐ Agree moderately
- ☐ Agree strongly
- ☐ I prefer not to respond

For the following questions, please try to imagine the city of the future. Please tell us for every possible development if you would appreciate it or not.

**There will be many car-free neighborhoods where car use is only allowed exceptionally and no car parking space is provided. (required)**

- ☐ I would not appreciate this development at all
- ☐ I would rather not appreciate this development

- ☐ I would rather appreciate this development
- ☐ I would really appreciate this development
- ☐ I do not know
- ☐ I prefer not to respond

**City centers will be closed to car-traffic. (required)**

- ☐ I would not appreciate this development at all
- ☐ I would rather not appreciate this development
- ☐ I would rather appreciate this development
- ☐ I would really appreciate this development
- ☐ I do not know
- ☐ I prefer not to respond

**Most roads and streets in the cities will be redesigned to privilege pedestrians, bicycles and public transport. (required)**

- ☐ I would not appreciate this development at all
- ☐ I would rather not appreciate this development
- ☐ I would rather appreciate this development
- ☐ I would really appreciate this development
- ☐ I do not know
- ☐ I prefer not to respond

**In cities, electric vehicles will completely replace combustion engines within the next 20-30 years. (required)**

- ☐ I would not appreciate this development at all
- ☐ I would rather not appreciate this development
- ☐ I would rather appreciate this development
- ☐ I would really appreciate this development
- ☐ I do not know
- ☐ I prefer not to respond

Please tell us your own personal preferences on the following statements.

**I would like to live in a car-free neighbourhood. (required)**

- ☐ Disagree strongly
- ☐ Disagree moderately
- ☐ Disagree slightly
- ☐ Agree slightly
- ☐ Agree moderately
- ☐ Agree strongly
- ☐ I prefer not to respond

**Major roads that I use regularly should be redesigned with a broad bicycle lane that replaces one car lane. (required)**

- ☐ Disagree strongly
- ☐ Disagree moderately
- ☐ Disagree slightly
- ☐ Agree slightly
- ☐ Agree moderately
- ☐ Agree strongly
- ☐ I prefer not to respond

**Please think of your own neighbourhood. Which of the following statements do you agree to most? Please select only one option. (required)**

- ☐ All parts of the city must be accessible by car. Therefore more car parking space should be provided.
- ☐ The number of parking spaces should stay as it is.
- ☐ The number of parking spaces should be reduced to make more space available for other uses (e.g. pedestrians, bike parking, playgrounds or parks).

**You have reached the end of the questionnaire. Thank you very much for your participation. Are there any comments or remarks that you would like leave? Your feedback is very much appreciated because I am very interested in your views and ideas either on the questionnaire itself or on the topic of driverless vehicles. (required)**
