# Supplementary material for: Acceptance of Driverless Vehicles: Results from a Large Cross-National Questionnaire Study
Source: Hindawi journal article supplement (doi:10.1155/2018/5382192), 2018-01-01
Supplement: f1 [file 5382192.f1.zip]

Archive with 2 entries (2 files):
- Results_overview19-3.xlsx
- Supplementary material.zip
