# Supplementary material for: Acceptance of Driverless Vehicles: Results from a Large Cross-National Questionnaire Study
Source: Hindawi journal article supplement (doi:10.1155/2018/5382192), 2018-01-01
Supplement: f1 [file 5382192.f1.zip › Results_overview19-3.xlsx]

## Sheet: descriptives 1 component
				M	SD	Median	-2	-1	0	1	2	3	4	5	6		loading		rho with GAC		rho with GAC (within a country)		rho with GAC (survey time & instructions clear partialled out)		rho between GDP per capita and countries' mean		rho between GDP per capita and countries' median	(used for mileage, Q17, which was a free-response item)
1			Survey time ranking 0-1	0.539027	0.269327	0.54375	0	0	7754	1	0	0	0	0	0		NaN		0.199642		0.144182		NaN		-0.647992		-0.601027
2			Survey end time	736430	2.52222	736431	0	0	0	0	0	0	0	0	0		NaN		0.0513975		0.0245048		0.0529242		-0.0975536		-0.064331
3			Survey start time	736430	2.52205	736431	0	0	0	0	0	0	0	0	0		NaN		0.0483		0.0208743		0.0527443		-0.0919662		-0.050891
4			Worker ID	3.21631e+07	7.71193e+06	35614610	0	0	0	0	0	0	0	0	0		NaN		NaN		0		NaN		NaN		NaN
5			What is your gender?	1.68807	0.46331	2	0	0	0	2419	5336	0	0	0	0		NaN		0.0652585		0.0141026		0.0936758		-0.488995		-0.364852
6			Q1. Have you read and understood the above instructions?	2	0	2	0	0	0	0	7755	0	0	0	0		NaN		NaN		NaN		NaN		NaN		NaN
7	41	Liking of being in control	Q70. A careful driver can prevent any accident on the road.	4.32906	1.39608	5	0	27	0	322	600	1059	1865	1996	1886		0.311209		NaN		NaN		NaN		-0.505889		-0.371792
8	52	Skeptical	Q42. Driverless vehicles would take away the pleasure or enjoyment	3.78435	1.41804	4	0	48	0	693	780	1340	2497	1477	920		-0.0797579		NaN		NaN		NaN		-0.223078		-0.0773771
9	46	Enjoy manual	Q30. Driving is especially fun for me.	4.43752	1.45154	5	0	137	0	458	445	741	1899	1812	2263		0.185431		NaN		NaN		NaN		-0.152377		0.000542794
10	58	Miscellaneous	Q67. Driving without accidents is mainly a matter of luck.	3.15932	1.52702	3	0	41	0	1439	1445	1417	1849	989	575		0.049715		NaN		NaN		NaN		-0.431592		-0.359809
11	57	Miscellaneous	Q62. Environmental protection is crucial for me in my choice of transportation.	4.63757	1.20872	5	0	46	0	143	291	697	2267	1999	2312		0.501372		NaN		NaN		NaN		-0.35971		-0.400668
12	18	Intention to use	Q51. Even if it were more expensive than my existing form of travel, I would prefer driverless vehicles to my existing form of travel.	3.71597	1.4503	4	0	34	0	756	850	1537	2170	1504	904		0.552191		NaN		NaN		NaN		-0.640139		-0.580664
13	25	Knowledge of mobility	Q77. I am often the first to make other people aware of new options for their own mobility.	3.9952	1.3285	4	0	50	0	428	656	1267	2542	1798	1014		0.507976		NaN		NaN		NaN		-0.608879		-0.490735
14	51	Satisfaction daily travel	Q31. I am satisfied with the possibilities available to cover my daily travel needs.	4.35847	1.27909	4	0	36	0	272	442	886	2348	2189	1582		0.106617		NaN		NaN		NaN		0.259373		0.18222
15	50	Satisfaction daily travel	Q28. I can organize my day flexibly with public transport.	3.73461	1.48839	4	0	72	0	884	821	1149	2308	1638	883		0.221188		NaN		NaN		NaN		-0.395651		-0.40646
16	48	Enjoy manual	Q29. I need a vehicle in order to be flexible.	4.77303	1.37888	5	0	36	0	294	355	601	1539	1700	3230		0.173551		NaN		NaN		NaN		-0.195115		0.0117045
17	47	Enjoy manual	Q66. I often feel like being a racing driver when driving manually.	3.39924	1.54665	4	0	148	0	1314	932	1388	2036	1250	687		0.176486		NaN		NaN		NaN		-0.647992		-0.530391
18	24	Knowledge of mobility	Q78. I often provide others with information regarding their mobility options.	3.99754	1.29538	4	0	36	0	396	662	1207	2670	1868	916		0.523951		NaN		NaN		NaN		-0.555723		-0.504572
19	23	Knowledge of mobility	Q75. I often think about how mobility in my city could be improved.	4.62634	1.2248	5	0	34	0	163	320	681	2179	2110	2268		0.559806		NaN		NaN		NaN		-0.46119		-0.312165
20	56	Miscellaneous	Q61. I prefer to keep a physical distance between myself and strangers.	4.09053	1.32211	4	0	56	0	369	601	1193	2538	1797	1201		-0.0303067		NaN		NaN		NaN		-0.0489278		0
21	39	Enjoyment of technology	Q73. I rapidly and intuitively learn to handle unfamiliar electronic devices.	4.67449	1.16616	5	0	44	0	136	255	605	2201	2304	2210		0.394237		NaN		NaN		NaN		0.236493		0.404997
22	3	Ease of use	Q50. I think driverless vehicles would be easier to use than my existing form of travel.	4.45969	1.27802	5	0	28	0	273	328	849	2280	2118	1879		0.713193		NaN		NaN		NaN		-0.572486		-0.563575
23	5	Pleasure	Q37. I think I would enjoy taking a ride in a driverless vehicle.	4.90435	1.22468	5	0	29	0	226	213	350	1610	2213	3114		0.672408		NaN		NaN		NaN		-0.118846		-0.0526145
24	2	Usefulness	Q53. I think that a driverless vehicle would be more useful than my existing form of travel.	4.35043	1.29889	4	0	36	0	308	391	948	2376	2033	1663		0.722786		NaN		NaN		NaN		-0.534753		-0.343483
25	4	Ease of use	Q52. I think that learning to operate a driverless vehicle would be easy for me.	4.75903	1.18492	5	0	61	0	162	218	536	2015	2228	2535		0.48739		NaN		NaN		NaN		-0.025068		-0.0367806
26	9	Trust	Q56. I trust that a driverless vehicle can drive without assistance from me.	4.36009	1.24883	4	0	18	0	280	370	872	2456	2280	1479		0.648505		NaN		NaN		NaN		-0.129417		-0.00518136
27	10	Trust	Q58. I trust the driverless vehicle to be safe and reliable in severe weather conditions, such as heavy rain, fog or snow.	4.1517	1.34323	4	0	36	0	384	532	1212	2346	1891	1354		0.580381		NaN		NaN		NaN		-0.363938		-0.131606
28	11	Trust	Q44. I would feel comfortable in a vehicle without a steering wheel, gas or brake pedals.	4.00855	1.4333	4	0	36	0	563	587	1388	2232	1581	1368		0.564677		NaN		NaN		NaN		-0.527882		-0.437128
29	54	Skeptical	Q57. I would feel uncomfortable entrusting the safety of a close family member to a driverless vehicle.	3.78167	1.33217	4	0	42	0	492	830	1621	2503	1461	806		-0.126363		NaN		NaN		NaN		-0.0829055		-0.236248
30	6	Pleasure	Q39. I would find it important that driverless vehicles are aesthetic in terms of styling and design.	4.6176	1.20653	5	0	51	0	201	263	601	2252	2286	2101		0.461224		NaN		NaN		NaN		-0.567351		-0.407922
31	13	Intention to use	Q80. I would like to buy a self-driving vehicle (assuming a price similar to a normal vehicle today).	4.2171	1.37039	4	0	35	0	446	504	900	2452	1914	1504		0.647537		NaN		NaN		NaN		-0.607369		-0.0835599
32	42	Liking of being in control	Q36. I would like to have a button inside the driverless vehicle which I can press to stop it	5.1798	1.14803	6	0	41	0	146	144	297	1299	1532	4296		0.26728		NaN		NaN		NaN		0.386454		0.255883
33	8	Social influence	Q60. I would like to have my friends or family or other important people to me adopt the driverless vehicle before I do.	3.76558	1.3034	4	0	85	0	520	740	1592	2676	1450	692		0.290627		NaN		NaN		NaN		-0.479405		-0.48224
34	49	Enjoy manual	Q69. I would like to learn to drive vehicles that can exceed the speed of 300 km/h.	3.27472	1.72064	3	0	49	0	1836	1011	1164	1604	1077	1014		0.15687		NaN		NaN		NaN		-0.588515		-0.586958
35	34	Wish for car-free future	Q92. I would like to live in a car-free neighbourhood.	3.87649	1.48004	4	0	47	0	703	730	1330	2236	1471	1238		0.405416		NaN		NaN		NaN		-0.356237		-0.346395
36	45	Liking of being in control	Q48. I would like to take over control from the driverless vehicle when I want this.	4.34255	1.3994	4	0	51	0	438	425	832	2314	1755	1940		0.0844781		NaN		NaN		NaN		-0.135458		-0.211441
37	22	Knowledge of mobility	Q87. I would like to use a mobility flat-rate for all mobility services in my city.	4.3262	1.11956	4	0	134	0	191	296	731	3194	2036	1173		0.576449		NaN		NaN		NaN		-0.361522		-0.0335855
38	17	Intention to use	Q82. I would like to use self-driving vehicles in a carsharing scheme.	4.09124	1.2734	4	0	116	0	402	492	1013	2807	1950	975		0.574259		NaN		NaN		NaN		-0.443085		-0.300058
39	16	Intention to use	Q81. I would like to use self-driving vehicles together with other passengers as a part of public transport.	4.31899	1.29136	4	0	40	0	366	384	793	2505	2214	1453		0.587005		NaN		NaN		NaN		-0.383117		-0.17148
40	55	Skeptical	Q59. I would not use a driverless vehicle because technology can sometimes fail.	3.47917	1.31966	4	0	27	0	636	1128	1995	2429	946	594		-0.350308		NaN		NaN		NaN		0.0431155		-0.125357
41	20	Intention to use	Q40. I would share a driverless vehicle with around 6-8 fellow travelers who have the same route like me.	4.47598	1.29001	5	0	32	0	296	343	752	2235	2192	1905		0.515261		NaN		NaN		NaN		-0.334642		-0.262721
42	12	Trust	Q64. I would trust the driving skills of a driverless vehicle more than my own driving skills.	3.79563	1.47032	4	0	58	0	732	803	1446	2060	1637	1019		0.489918		NaN		NaN		NaN		-0.436575		-0.448824
43	15	Intention to use	Q43. I would use a 100% electric driverless vehicle from the train station or some other public transport stop to my final destination or vice versa.	4.72321	1.25137	5	0	38	0	256	227	506	1965	2217	2546		0.591885		NaN		NaN		NaN		-0.0859257		-0.0214438
44	1	Usefulness	Q49. I would use a driverless vehicle for my daily travel because it would be better and more convenient than my existing form of travel.	4.47586	1.28035	5	0	28	0	289	329	754	2293	2168	1894		0.730856		NaN		NaN		NaN		-0.460737		-0.386988
45	14	Intention to use	Q38. I would use a driverless vehicle that is 100% electric.	5.09102	1.19929	6	0	42	0	200	168	301	1316	1804	3924		0.608643		NaN		NaN		NaN		0.0149502		-0.0574936
46	38	Enjoyment of technology	Q74. It is fun for me to use an electronic device.	4.99326	1.10351	5	0	35	0	79	179	402	1656	2143	3261		0.459018		NaN		NaN		NaN		0.143914		0.0702357
47	31	Wish for car-free future	Q93. Major roads that I use regularly should be redesigned with a broad bicycle lane that replaces one car lane.	4.19836	1.35171	4	0	77	0	407	461	1077	2491	1741	1501		0.472926		NaN		NaN		NaN		-0.350498		-0.125539
48	40	Enjoyment of technology	Q72. My friends and acquaintances often ask for my advice, when they have a technical problem.	4.00026	1.3149	4	0	58	0	450	655	1066	2719	1886	921		0.330453		NaN		NaN		NaN		-0.142404		0.149209
49	26	Knowledge of mobility	Q76. My friends and acquaintances often consult me on questions regarding mobility or travel options.	4.00233	1.30059	4	0	45	0	401	656	1208	2633	1883	929		0.488745		NaN		NaN		NaN		-0.511175		-0.439009
50	7	Social influence	Q63. People who are important to me would like it when I would use a driverless vehicle.	4.32616	1.17937	4	0	139	0	221	328	896	2725	2193	1253		0.655416		NaN		NaN		NaN		-0.519783		-0.328257
51	27	Future orientation	Q83. Self-driving vehicles will be legally accepted as independent drivers (so that no human driver will need to be on board).	4.13547	1.24286	4	0	78	0	345	414	1122	2816	1935	1045		0.561733		NaN		NaN		NaN		-0.302035		0.115685
52			Q2. The definitions given in the instructions are clear to me.	5.36322	1.08997	6	0	38	0	219	93	96	655	1849	4805		NaN		0.224034		0.258789		NaN		0.428739		0.443046
53	53	Skeptical	Q65. There will always be accidents, even with driverless vehicles on the road.	4.37828	1.26616	4	0	49	0	227	434	908	2463	1976	1698		-0.0896175		NaN		NaN		NaN		0.311851		0.252633
54	43	Liking of being in control	Q68. When a driver is involved in an accident, it is because he or she did not drive properly.	3.91751	1.40665	4	0	45	0	471	877	1415	2100	1748	1099		0.216446		NaN		NaN		NaN		-0.540059		-0.320537
55			Q12. Please indicate the net income of your household per month. This includes the entire income of all persons belonging to your household including wages, salaries and other remuneration, self-employment income, pension, benefits for unemployment, housing and childcare etc. without taxes and social security contributions.	2.44582	1.45786	2	0	723	0	2468	1629	1384	784	417	350		NaN		-0.00621584		0.061559		-0.0117028		0.714038		0.731452
56			Q9. How many miles do you live away from your workplace, training post or school?	9.42866	15.5604	5	0	0	415	657	722	633	322	663	183		NaN		0.0742669		0.0600731		0.0752084		0.300664		0.278255
57			Q15. How many vehicles do you have in your household?	1.33541	0.864711	1	0	48	1023	3896	2147	462	179	0	0		NaN		-0.000681671		0.00858691		-0.00524714		0.218514		-0.0964479
58			Q20. How many minutes does it or would it take you by foot from your home to the nearest public transport stop?	1.93191	1.04304	2	205	31	0	3194	2547	1139	374	265	0		NaN		0.028544		0.0113723		0.0506378		-0.191483		-0.0797338
59			Q8. If you include yourself, how many people in your household are younger than 6 years old?	0.347088	0.744089	0	0	0	5699	1508	346	45	20	17	13		NaN		0.0401085		0.0192885		0.0423739		-0.536943		NaN
60			Q8. If you include yourself, how many people in your household are 6 to 13 years old?	0.359932	0.79214	0	0	0	5673	1504	357	63	23	14	5		NaN		0.0384263		0.0232748		0.0397187		-0.262307		NaN
61			Q8. If you include yourself, how many people in your household are 14-17 years old?	0.269372	0.634732	0	0	0	6039	1296	237	30	17	9	5		NaN		0.0465241		0.0261128		0.0613058		-0.517405		NaN
62			Q8. If you include yourself, how many people in your household are over 18 years old?	2.67212	1.40224	2	0	0	318	916	2810	1631	1236	474	173		NaN		0.0854752		0.0131135		0.0756029		-0.720278		-0.635342
63			Q4. Please indicate your year of birth (converted to age)	32.4949	10.5284	30	0	0	0	0	0	0	0	0	0		NaN		0.0227675		0.0833965		-0.0218341		0.599366		0.591165
64	44	Liking of being in control	Q46. An external control room may monitor the operations of the driverless vehicle for safety reasons. No private data will be collected from you. Would you mind being transported by a driverless vehicle that is supervised by an external control room?	1.58331	0.493043	2	0	229	0	3136	4390	0	0	0	0		0.119298		NaN		NaN		NaN		-0.498905		-0.49869
65			Q17. How many miles do you estimate to travel per year in a vehicle, regardless of whether as a driver or passenger?	8189.78	16524.3	2000	0	0	119	103	60	62	9	84	14		NaN		-0.00122089		0.0675281		-0.0399039		0.632286		0.710197
66			Q71. Please indicate the severity of motion sickness you experience in a moving conventional vehicle or when taking public transport means.	1.6981	0.721658	2	0	438	0	3343	2840	1134	0	0	0		NaN		-0.0910008		-0.0842379		-0.0474949		-0.227122		-0.226033
67	36	Wish for car-free future	Q89. Imagine… City centers will be closed to car-traffic.	2.893	0.989046	3	834	52	0	789	1399	2439	2242	0	0		0.318076		NaN		NaN		NaN		-0.479329		-0.261116
68	32	Wish for car-free future	Q91. Imagine… In cities, electric vehicles will completely replace combustion engines within the next 20-30 years.	3.37432	0.816212	4	676	45	0	307	598	2284	3845	0	0		0.425468		NaN		NaN		NaN		-0.297882		-0.28811
69	33	Wish for car-free future	Q90. Imagine… Most roads and streets in the cities will be redesigned to privilege pedestrians, bicycles and public transport.	3.2118	0.87516	3	534	54	0	411	913	2590	3253	0	0		0.407522		NaN		NaN		NaN		-0.4701		-0.352194
70	35	Wish for car-free future	Q88. Imagine… There will be many car-free neighborhoods where car use is only allowed exceptionally and no car parking space is provided.	2.94404	0.956867	3	949	87	0	672	1258	2563	2226	0	0		0.393741		NaN		NaN		NaN		-0.371579		-0.476703
71			Q25. How often do you use the following transport modes? Conventional vehicle, as a driver or passenger.	3.90192	1.32685	4	0	88	0	705	673	912	1756	3621	0		NaN		0.0752186		0.072004		0.0460311		0.33887		0.37177
72			Q23. How often do you use the following transport modes? Cycling.	2.14369	1.34121	2	0	37	0	3680	1424	1050	953	611	0		NaN		0.0598131		0.0568693		0.0897798		-0.12534		-0.173022
73			Q24. How often do you use the following transport modes? Moped or motorcycle as a driver.	1.76439	1.3322	1	0	77	0	5366	641	463	530	678	0		NaN		0.0762254		0.00715167		0.105163		-0.389761		-0.591115
74	19	Intention to use	Q41. Please indicate how often you intend to use a driverless vehicle when it is available on the market	3.67202	1.2733	4	0	93	0	633	894	1399	2163	2573	0		0.525232		NaN		NaN		NaN		-0.420508		-0.476756
75			Q26. How often do you use the following transport modes? Public transport for trips of less than 100 km per one-way	2.91271	1.41496	3	0	45	0	1591	1815	1475	1334	1495	0		NaN		0.140758		0.0874143		0.150293		-0.364995		-0.22654
76			Q27. How often do you use the following transport modes? Public transport for trips of more than 100 km per one-way	2.14527	1.15116	2	0	52	0	2663	2771	1205	615	449	0		NaN		0.101883		0.0336613		0.140569		-0.611598		-0.568547
77			Q22. Walking for more than 500 meters per trip.	3.96146	1.29169	4	0	49	0	625	674	810	1861	3736	0		NaN		0.0758322		0.0772175		0.0684458		-0.0732407		0.125019
78			Q19. Do you have a monthly pass or an annual travel card for public transport?	1.33992	0.473713	1	0	65	0	5076	2614	0	0	0	0		NaN		0.106003		0.0686438		0.131438		0.0901574		0.0964479
79			Q13. Do you have a valid driver's license?	1.79917	0.400649	2	0	72	0	1543	6140	0	0	0	0		NaN		0.0305889		0.0464203		0.0168664		0.386439		0.329257
80			Q16. How difficult is it usually to find a parking space?	2.51724	0.899886	3	0	0	0	957	2572	2566	1041	0	0		NaN		0.169238		0.120063		0.162711		-0.390214		-0.391579
81			Q18. In how many accidents were you involved in when driving a vehicle in the last 3 years? Please indicate all accidents, regardless of how they were caused, how severe they were, or where they happened.	0.427639	0.813103	0	0	0	5502	1404	499	176	63	19	0		NaN		0.0220648		-0.0117188		0.0430599		-0.463926		-0.164818
82			Q21. In how many carsharing organizations are you a member?	0.217467	0.514448	0	0	20	6105	1109	232	0	0	0	8		NaN		0.0347121		0.011708		0.0778741		-0.716605		NaN
83	21	Intention to use	Q54. Please indicate when you would use a driverless vehicle. Please select only the most relevant option to you.	3.73917	1.15211	4	0	68	0	221	768	2228	2555	1408	507		0.107443		NaN		NaN		NaN		-0.281033		-0.291206
84	37	Wish for car-free future	Q94. Please think of your own neighbourhood. Which of the following statements do you agree to most? Please select only one option.	1.83275	0.821751	2	0	0	0	3375	2302	2078	0	0	0		0.136874		NaN		NaN		NaN		0.125571		0.429147
85	28	Future orientation	Q86. Self-driving vehicles will be a normal part of everyday mobility.	3.43025	0.787628	4	474	41	0	231	665	2102	4242	0	0		0.451986		NaN		NaN		NaN		-0.136666		-0.133591
86	30	Future orientation	Q85. Self-driving vehicles will mostly be privately owned.	3.22045	0.930745	4	767	43	0	426	1133	1870	3516	0	0		0.235903		NaN		NaN		NaN		-0.341174		-0.471517
87	29	Future orientation	Q84. Self-driving vehicles will mostly be shared vehicles.	3.35726	0.849318	4	842	58	0	338	671	2050	3796	0	0		0.309771		NaN		NaN		NaN		-0.108884		-0.284217
88			Which of the following possibilities describe your current residential situation the most?	2.94512	0.894945	3	0	139	0	676	1242	3522	2176	0	0		NaN		0.117703		0.0788109		0.0976968		-0.301582		-0.182593
89			General acceptance score	1.34887e-16	1	0.0612306											NaN		1		1		1		-0.481577		-0.469798
90			PCA-1 score (General acceptance)	-6.06006e-17	1	0.0675494													0.942711		0.93597		0.937651		-0.424796		-0.339777
91			PCA-2 score (Thrill seeking)	-1.70649e-17	1	0.0158609													0.094437		0.0370456		0.203484		-0.71791		-0.692087
92			PCA-3 score (Wanting to be in control manually)	1.57035e-16	1	0.0664263													0.242872		0.242433		0.183463		0.212776		0.137421
93			PCA-4 score (Supporting a car-free environment)	-5.92405e-17	1	0.102007													0.596603		0.570368		0.589142		-0.440803		-0.428571
94			PCA-5 score (Being comfortable with technology)	-1.64923e-17	1	0.0146338													0.664069		0.62754		0.646051		-0.439897		-0.445183

## Sheet: descriptives 5 components
					loading						rho with component 1-5						rho with component 1-5 (within a country)						rho with component 1-5 (survey time & instructions clear partialled out)
					C1	C2	C3	C4	C5		C1	C2	C3	C4	C5		C1	C2	C3	C4	C5		C1	C2	C3	C4	C5
1			Survey time ranking 0-1		NaN	NaN	NaN	NaN	NaN		0.234994	-0.23817	0.164116	0.0849788	0.150838		0.193798	-0.289743	0.162457	0.0482044	0.10276		NaN	NaN	NaN	NaN	NaN
2			Survey end time		NaN	NaN	NaN	NaN	NaN		0.0517507	0.0205004	-0.0220637	-0.00606638	0.0527252		0.0260836	0.0114199	-0.0290004	-0.0117357	0.0262135		0.0534246	0.0250711	-0.0226511	-0.00576576	0.0527613
3			Survey start time		NaN	NaN	NaN	NaN	NaN		0.0481547	0.0238282	-0.0247038	-0.00718684	0.0503642		0.0213392	0.0155083	-0.0321425	-0.0131579	0.0238182		0.053268	0.0248415	-0.0228454	-0.0056188	0.0525967
4			Worker ID		NaN	NaN	NaN	NaN	NaN		NaN	NaN	NaN	NaN	NaN		0	0	0	0	0		NaN	NaN	NaN	NaN	NaN
5			What is your gender?		NaN	NaN	NaN	NaN	NaN		0.0108053	0.124969	-0.00257566	0.0269393	0.153889		-0.0315067	0.0588808	0.0098663	-0.0142797	0.117431		0.0406473	0.107505	0.0198471	0.0382177	0.175459
6			Q1. Have you read and understood the above instructions?		NaN	NaN	NaN	NaN	NaN		NaN	NaN	NaN	NaN	NaN		NaN	NaN	NaN	NaN	NaN		NaN	NaN	NaN	NaN	NaN
7	41	Liking of being in control	Q70. A careful driver can prevent any accident on the road.		0.0825777	0.193443	0.199636	0.0875509	0.150494		NaN	NaN	NaN	NaN	NaN		NaN	NaN	NaN	NaN	NaN		NaN	NaN	NaN	NaN	NaN
8	52	Skeptical	Q42. Driverless vehicles would take away the pleasure or enjoyment		-0.262321	0.304576	0.41712	-0.0327191	0.0617252		NaN	NaN	NaN	NaN	NaN		NaN	NaN	NaN	NaN	NaN		NaN	NaN	NaN	NaN	NaN
9	46	Enjoy manual	Q30. Driving is especially fun for me.		0.00711671	0.191831	0.479594	-0.155775	0.19309		NaN	NaN	NaN	NaN	NaN		NaN	NaN	NaN	NaN	NaN		NaN	NaN	NaN	NaN	NaN
10	58	Miscellaneous	Q67. Driving without accidents is mainly a matter of luck.		-0.0267724	0.542421	-0.00397928	-0.00339271	-0.00224681		NaN	NaN	NaN	NaN	NaN		NaN	NaN	NaN	NaN	NaN		NaN	NaN	NaN	NaN	NaN
11	57	Miscellaneous	Q62. Environmental protection is crucial for me in my choice of transportation.		0.258268	0.0587661	0.184283	0.214086	0.100382		NaN	NaN	NaN	NaN	NaN		NaN	NaN	NaN	NaN	NaN		NaN	NaN	NaN	NaN	NaN
12	18	Intention to use	Q51. Even if it were more expensive than my existing form of travel, I would prefer driverless vehicles to my existing form of travel.		0.508568	0.423754	-0.124108	-0.0267051	0.0809084		NaN	NaN	NaN	NaN	NaN		NaN	NaN	NaN	NaN	NaN		NaN	NaN	NaN	NaN	NaN
13	25	Knowledge of mobility	Q77. I am often the first to make other people aware of new options for their own mobility.		-0.0456724	0.279317	-0.120162	0.0230244	0.802743		NaN	NaN	NaN	NaN	NaN		NaN	NaN	NaN	NaN	NaN		NaN	NaN	NaN	NaN	NaN
14	51	Satisfaction daily travel	Q31. I am satisfied with the possibilities available to cover my daily travel needs.		0.0477526	0.128167	0.47313	0.00725162	-0.125061		NaN	NaN	NaN	NaN	NaN		NaN	NaN	NaN	NaN	NaN		NaN	NaN	NaN	NaN	NaN
15	50	Satisfaction daily travel	Q28. I can organize my day flexibly with public transport.		0.122102	0.114212	0.0979231	0.215421	-0.109324		NaN	NaN	NaN	NaN	NaN		NaN	NaN	NaN	NaN	NaN		NaN	NaN	NaN	NaN	NaN
16	48	Enjoy manual	Q29. I need a vehicle in order to be flexible.		0.185965	-0.013226	0.43422	-0.222265	0.0419569		NaN	NaN	NaN	NaN	NaN		NaN	NaN	NaN	NaN	NaN		NaN	NaN	NaN	NaN	NaN
17	47	Enjoy manual	Q66. I often feel like being a racing driver when driving manually.		-0.0474254	0.597892	0.0964435	-0.0720658	0.235485		NaN	NaN	NaN	NaN	NaN		NaN	NaN	NaN	NaN	NaN		NaN	NaN	NaN	NaN	NaN
18	24	Knowledge of mobility	Q78. I often provide others with information regarding their mobility options.		-0.0178988	0.273433	-0.0978895	0.0254953	0.777093		NaN	NaN	NaN	NaN	NaN		NaN	NaN	NaN	NaN	NaN		NaN	NaN	NaN	NaN	NaN
19	23	Knowledge of mobility	Q75. I often think about how mobility in my city could be improved.		0.19407	-0.0733523	0.1237	0.129464	0.416666		NaN	NaN	NaN	NaN	NaN		NaN	NaN	NaN	NaN	NaN		NaN	NaN	NaN	NaN	NaN
20	56	Miscellaneous	Q61. I prefer to keep a physical distance between myself and strangers.		-0.0922194	0.187722	0.372106	0.0518066	-0.147294		NaN	NaN	NaN	NaN	NaN		NaN	NaN	NaN	NaN	NaN		NaN	NaN	NaN	NaN	NaN
21	39	Enjoyment of technology	Q73. I rapidly and intuitively learn to handle unfamiliar electronic devices.		0.0441177	-0.267356	0.223044	-0.0229483	0.532948		NaN	NaN	NaN	NaN	NaN		NaN	NaN	NaN	NaN	NaN		NaN	NaN	NaN	NaN	NaN
22	3	Ease of use	Q50. I think driverless vehicles would be easier to use than my existing form of travel.		0.77331	0.14011	-0.0142434	-0.0243736	-0.039426		NaN	NaN	NaN	NaN	NaN		NaN	NaN	NaN	NaN	NaN		NaN	NaN	NaN	NaN	NaN
23	5	Pleasure	Q37. I think I would enjoy taking a ride in a driverless vehicle.		0.786653	-0.11127	0.181876	-0.0587915	-0.10739		NaN	NaN	NaN	NaN	NaN		NaN	NaN	NaN	NaN	NaN		NaN	NaN	NaN	NaN	NaN
24	2	Usefulness	Q53. I think that a driverless vehicle would be more useful than my existing form of travel.		0.750827	0.149366	-0.0276875	-0.00660652	-0.00596204		NaN	NaN	NaN	NaN	NaN		NaN	NaN	NaN	NaN	NaN		NaN	NaN	NaN	NaN	NaN
25	4	Ease of use	Q52. I think that learning to operate a driverless vehicle would be easy for me.		0.431812	-0.124875	0.29924	-0.0833121	0.107571		NaN	NaN	NaN	NaN	NaN		NaN	NaN	NaN	NaN	NaN		NaN	NaN	NaN	NaN	NaN
26	9	Trust	Q56. I trust that a driverless vehicle can drive without assistance from me.		0.754732	-0.0252586	-0.0275481	-0.0737934	-0.021621		NaN	NaN	NaN	NaN	NaN		NaN	NaN	NaN	NaN	NaN		NaN	NaN	NaN	NaN	NaN
27	10	Trust	Q58. I trust the driverless vehicle to be safe and reliable in severe weather conditions, such as heavy rain, fog or snow.		0.642746	0.176516	-0.111007	-0.0719074	0.0224144		NaN	NaN	NaN	NaN	NaN		NaN	NaN	NaN	NaN	NaN		NaN	NaN	NaN	NaN	NaN
28	11	Trust	Q44. I would feel comfortable in a vehicle without a steering wheel, gas or brake pedals.		0.653931	0.104247	-0.175035	-0.0175694	-0.0287565		NaN	NaN	NaN	NaN	NaN		NaN	NaN	NaN	NaN	NaN		NaN	NaN	NaN	NaN	NaN
29	54	Skeptical	Q57. I would feel uncomfortable entrusting the safety of a close family member to a driverless vehicle.		-0.34199	0.293265	0.393833	0.0978513	-0.00666167		NaN	NaN	NaN	NaN	NaN		NaN	NaN	NaN	NaN	NaN		NaN	NaN	NaN	NaN	NaN
30	6	Pleasure	Q39. I would find it important that driverless vehicles are aesthetic in terms of styling and design.		0.428159	0.121826	0.356409	-0.0531684	-0.0332368		NaN	NaN	NaN	NaN	NaN		NaN	NaN	NaN	NaN	NaN		NaN	NaN	NaN	NaN	NaN
31	13	Intention to use	Q80. I would like to buy a self-driving vehicle (assuming a price similar to a normal vehicle today).		0.6228	0.104537	-0.0327713	-0.0218697	0.0920268		NaN	NaN	NaN	NaN	NaN		NaN	NaN	NaN	NaN	NaN		NaN	NaN	NaN	NaN	NaN
32	42	Liking of being in control	Q36. I would like to have a button inside the driverless vehicle which I can press to stop it		0.284089	-0.255029	0.584719	-0.0100208	-0.16421		NaN	NaN	NaN	NaN	NaN		NaN	NaN	NaN	NaN	NaN		NaN	NaN	NaN	NaN	NaN
33	8	Social influence	Q60. I would like to have my friends or family or other important people to me adopt the driverless vehicle before I do.		0.27511	0.487292	0.206985	-0.0159099	-0.130841		NaN	NaN	NaN	NaN	NaN		NaN	NaN	NaN	NaN	NaN		NaN	NaN	NaN	NaN	NaN
34	49	Enjoy manual	Q69. I would like to learn to drive vehicles that can exceed the speed of 300 km/h.		-0.0545415	0.448898	0.0490977	-0.132014	0.324869		NaN	NaN	NaN	NaN	NaN		NaN	NaN	NaN	NaN	NaN		NaN	NaN	NaN	NaN	NaN
35	34	Wish for car-free future	Q92. I would like to live in a car-free neighbourhood.		0.00791986	-0.04023	-0.0410559	0.666123	-0.00441407		NaN	NaN	NaN	NaN	NaN		NaN	NaN	NaN	NaN	NaN		NaN	NaN	NaN	NaN	NaN
36	45	Liking of being in control	Q48. I would like to take over control from the driverless vehicle when I want this.		-0.0164221	0.172246	0.532655	-0.0622923	-0.0319715		NaN	NaN	NaN	NaN	NaN		NaN	NaN	NaN	NaN	NaN		NaN	NaN	NaN	NaN	NaN
37	22	Knowledge of mobility	Q87. I would like to use a mobility flat-rate for all mobility services in my city.		0.383979	-0.0495858	0.115835	0.168428	0.12642		NaN	NaN	NaN	NaN	NaN		NaN	NaN	NaN	NaN	NaN		NaN	NaN	NaN	NaN	NaN
38	17	Intention to use	Q82. I would like to use self-driving vehicles in a carsharing scheme.		0.465497	0.175329	-0.0840665	0.0639969	0.1309		NaN	NaN	NaN	NaN	NaN		NaN	NaN	NaN	NaN	NaN		NaN	NaN	NaN	NaN	NaN
39	16	Intention to use	Q81. I would like to use self-driving vehicles together with other passengers as a part of public transport.		0.533831	0.0490496	-0.0589903	0.0700318	0.0638941		NaN	NaN	NaN	NaN	NaN		NaN	NaN	NaN	NaN	NaN		NaN	NaN	NaN	NaN	NaN
40	55	Skeptical	Q59. I would not use a driverless vehicle because technology can sometimes fail.		-0.57785	0.298134	0.341098	0.132581	-0.0191566		NaN	NaN	NaN	NaN	NaN		NaN	NaN	NaN	NaN	NaN		NaN	NaN	NaN	NaN	NaN
41	20	Intention to use	Q40. I would share a driverless vehicle with around 6-8 fellow travelers who have the same route like me.		0.514338	0.00371351	0.107278	0.0304594	-0.0333568		NaN	NaN	NaN	NaN	NaN		NaN	NaN	NaN	NaN	NaN		NaN	NaN	NaN	NaN	NaN
42	12	Trust	Q64. I would trust the driving skills of a driverless vehicle more than my own driving skills.		0.515583	0.344063	-0.216299	0.0829824	-0.0755351		NaN	NaN	NaN	NaN	NaN		NaN	NaN	NaN	NaN	NaN		NaN	NaN	NaN	NaN	NaN
43	15	Intention to use	Q43. I would use a 100% electric driverless vehicle from the train station or some other public transport stop to my final destination or vice versa.		0.670086	-0.161634	0.199089	-0.0152753	-0.0975894		NaN	NaN	NaN	NaN	NaN		NaN	NaN	NaN	NaN	NaN		NaN	NaN	NaN	NaN	NaN
44	1	Usefulness	Q49. I would use a driverless vehicle for my daily travel because it would be better and more convenient than my existing form of travel.		0.798984	0.0831315	0.0324826	-0.0297669	-0.049905		NaN	NaN	NaN	NaN	NaN		NaN	NaN	NaN	NaN	NaN		NaN	NaN	NaN	NaN	NaN
45	14	Intention to use	Q38. I would use a driverless vehicle that is 100% electric.		0.685224	-0.190505	0.298512	0.00787359	-0.148022		NaN	NaN	NaN	NaN	NaN		NaN	NaN	NaN	NaN	NaN		NaN	NaN	NaN	NaN	NaN
46	38	Enjoyment of technology	Q74. It is fun for me to use an electronic device.		0.19443	-0.335006	0.311823	0.00250703	0.369822		NaN	NaN	NaN	NaN	NaN		NaN	NaN	NaN	NaN	NaN		NaN	NaN	NaN	NaN	NaN
47	31	Wish for car-free future	Q93. Major roads that I use regularly should be redesigned with a broad bicycle lane that replaces one car lane.		0.0505836	-0.00973563	0.0444853	0.576583	0.0821555		NaN	NaN	NaN	NaN	NaN		NaN	NaN	NaN	NaN	NaN		NaN	NaN	NaN	NaN	NaN
48	40	Enjoyment of technology	Q72. My friends and acquaintances often ask for my advice, when they have a technical problem.		-0.12155	0.00444966	0.0323783	-0.0261999	0.692198		NaN	NaN	NaN	NaN	NaN		NaN	NaN	NaN	NaN	NaN		NaN	NaN	NaN	NaN	NaN
49	26	Knowledge of mobility	Q76. My friends and acquaintances often consult me on questions regarding mobility or travel options.		-0.0574673	0.26484	-0.0823521	0.0200142	0.782102		NaN	NaN	NaN	NaN	NaN		NaN	NaN	NaN	NaN	NaN		NaN	NaN	NaN	NaN	NaN
50	7	Social influence	Q63. People who are important to me would like it when I would use a driverless vehicle.		0.574023	0.198948	0.0244939	0.0257399	0.0862183		NaN	NaN	NaN	NaN	NaN		NaN	NaN	NaN	NaN	NaN		NaN	NaN	NaN	NaN	NaN
51	27	Future orientation	Q83. Self-driving vehicles will be legally accepted as independent drivers (so that no human driver will need to be on board).		0.519181	0.138277	-0.102146	0.027831	0.083567		NaN	NaN	NaN	NaN	NaN		NaN	NaN	NaN	NaN	NaN		NaN	NaN	NaN	NaN	NaN
52			Q2. The definitions given in the instructions are clear to me.		NaN	NaN	NaN	NaN	NaN		0.256258	-0.218695	0.205944	0.103427	0.152453		0.278996	-0.18148	0.194105	0.127421	0.17833		NaN	NaN	NaN	NaN	NaN
53	53	Skeptical	Q65. There will always be accidents, even with driverless vehicles on the road.		-0.166172	-0.103501	0.409476	0.0716071	-0.0981669		NaN	NaN	NaN	NaN	NaN		NaN	NaN	NaN	NaN	NaN		NaN	NaN	NaN	NaN	NaN
54	43	Liking of being in control	Q68. When a driver is involved in an accident, it is because he or she did not drive properly.		0.00641561	0.317522	0.0934612	0.0978406	0.119999		NaN	NaN	NaN	NaN	NaN		NaN	NaN	NaN	NaN	NaN		NaN	NaN	NaN	NaN	NaN
55			Q12. Please indicate the net income of your household per month. This includes the entire income of all persons belonging to your household including wages, salaries and other remuneration, self-employment income, pension, benefits for unemployment, housing and childcare etc. without taxes and social security contributions.		NaN	NaN	NaN	NaN	NaN		0.00457745	-0.0813303	0.0383443	-0.0538507	0.0314447		0.0505997	-0.0146092	0.0360307	0.00055687	0.0937866		7.97688e-05	-0.0872227	0.0318468	-0.0589378	0.0312899
56			Q9. How many miles do you live away from your workplace, training post or school?		NaN	NaN	NaN	NaN	NaN		0.0662481	0.00699596	0.00809143	0.00432149	0.0939489		0.05436	-0.0163379	0.00438007	2.69049e-05	0.0761654		0.0672135	0.00984239	0.00586518	0.00413898	0.0953924
57			Q15. How many vehicles do you have in your household?		NaN	NaN	NaN	NaN	NaN		-0.0132806	-0.00078777	0.0977096	-0.0709031	0.0693301		-0.00574773	0.0167336	0.0910263	-0.077535	0.086853		-0.0193494	0.00208644	0.0970269	-0.0740891	0.0682327
58			Q20. How many minutes does it or would it take you by foot from your home to the nearest public transport stop?		NaN	NaN	NaN	NaN	NaN		0.0155429	0.120183	-0.0529601	-0.00701345	0.0118818		0.00709127	0.0906482	-0.0545076	-0.00973481	-0.00641489		0.04111	0.103353	-0.0370021	0.00130099	0.0270483
59			Q8. If you include yourself, how many people in your household are younger than 6 years old?		NaN	NaN	NaN	NaN	NaN		0.0237103	0.0562206	0.00380489	0.0182161	0.0375143		0.0105838	0.0265744	0.00664193	0.00911463	0.0186933		0.0253657	0.0601389	0.00486308	0.019825	0.0382518
60			Q8. If you include yourself, how many people in your household are 6 to 13 years old?		NaN	NaN	NaN	NaN	NaN		0.0281082	0.0578653	0.00443865	0.00361567	0.0424308		0.0168835	0.0448994	0.0022301	-0.00130209	0.030205		0.0287555	0.0639001	0.00412863	0.00447758	0.0420757
61			Q8. If you include yourself, how many people in your household are 14-17 years old?		NaN	NaN	NaN	NaN	NaN		0.0243051	0.0966908	-0.0178882	0.0192577	0.0525012		0.00986379	0.0633534	-0.0128008	0.0127765	0.0393471		0.0410875	0.088183	-0.00607047	0.0239254	0.062416
62			Q8. If you include yourself, how many people in your household are over 18 years old?		NaN	NaN	NaN	NaN	NaN		0.0729238	0.047455	0.0181695	0.0370596	0.0772528		0.0173722	-0.0239699	0.021411	-0.0110684	0.0145103		0.0605893	0.070515	0.00725734	0.0320133	0.0680331
63			Q4. Please indicate your year of birth (converted to age)		NaN	NaN	NaN	NaN	NaN		0.0512768	-0.172008	0.0541409	0.0653158	-0.0356569		0.105074	-0.11274	0.04594	0.0944168	0.0140408		0.00146942	-0.13634	0.0167979	0.0467916	-0.0679155
64	44	Liking of being in control	Q46. An external control room may monitor the operations of the driverless vehicle for safety reasons. No private data will be collected from you. Would you mind being transported by a driverless vehicle that is supervised by an external control room?		0.00991333	0.203366	-0.0360579	0.0594204	0.0790394		NaN	NaN	NaN	NaN	NaN		NaN	NaN	NaN	NaN	NaN		NaN	NaN	NaN	NaN	NaN
65			Q17. How many miles do you estimate to travel per year in a vehicle, regardless of whether as a driver or passenger?		NaN	NaN	NaN	NaN	NaN		0.0201672	-0.196351	0.12403	-0.0569786	0.0466845		0.0738512	-0.146653	0.115426	-0.00497507	0.109177		-0.0236743	-0.167585	0.0939258	-0.0745783	0.0215118
66			Q71. Please indicate the severity of motion sickness you experience in a moving conventional vehicle or when taking public transport means.		NaN	NaN	NaN	NaN	NaN		-0.110207	0.184916	-0.119146	-0.0312625	-0.0919879		-0.0976339	0.157679	-0.105794	-0.0390213	-0.0900821		-0.0604757	0.1431	-0.0827722	-0.0116322	-0.0608152
67	36	Wish for car-free future	Q89. Imagine… City centers will be closed to car-traffic.		-0.150832	0.0177449	-0.0955119	0.780126	-0.00764922		NaN	NaN	NaN	NaN	NaN		NaN	NaN	NaN	NaN	NaN		NaN	NaN	NaN	NaN	NaN
68	32	Wish for car-free future	Q91. Imagine… In cities, electric vehicles will completely replace combustion engines within the next 20-30 years.		0.0819801	-0.186814	0.0388002	0.603738	-0.0198518		NaN	NaN	NaN	NaN	NaN		NaN	NaN	NaN	NaN	NaN		NaN	NaN	NaN	NaN	NaN
69	33	Wish for car-free future	Q90. Imagine… Most roads and streets in the cities will be redesigned to privilege pedestrians, bicycles and public transport.		-0.0576947	-0.0658968	-0.0350074	0.757048	0.0108085		NaN	NaN	NaN	NaN	NaN		NaN	NaN	NaN	NaN	NaN		NaN	NaN	NaN	NaN	NaN
70	35	Wish for car-free future	Q88. Imagine… There will be many car-free neighborhoods where car use is only allowed exceptionally and no car parking space is provided.		-0.0707125	0.0968557	-0.104099	0.718634	0.0355173		NaN	NaN	NaN	NaN	NaN		NaN	NaN	NaN	NaN	NaN		NaN	NaN	NaN	NaN	NaN
71			Q25. How often do you use the following transport modes? Conventional vehicle, as a driver or passenger.		NaN	NaN	NaN	NaN	NaN		0.0936953	-0.138569	0.138778	-0.0699363	0.116963		0.0828706	-0.104464	0.129274	-0.0598436	0.118532		0.0611025	-0.111782	0.114036	-0.0847603	0.096701
72			Q23. How often do you use the following transport modes? Cycling.		NaN	NaN	NaN	NaN	NaN		-0.00300722	0.182103	-0.0497444	0.084227	0.109962		-0.00466495	0.151791	-0.0293541	0.0571499	0.11503		0.0286721	0.162387	-0.0287178	0.0968655	0.133431
73			Q24. How often do you use the following transport modes? Moped or motorcycle as a driver.		NaN	NaN	NaN	NaN	NaN		0.014404	0.226403	-0.0359104	0.041338	0.117347		-0.0366355	0.164125	-0.043017	-0.0200617	0.0643481		0.0450759	0.211675	-0.0146052	0.0524287	0.137782
74	19	Intention to use	Q41. Please indicate how often you intend to use a driverless vehicle when it is available on the market		0.600303	-0.170135	-0.0906898	-0.0419808	0.0414257		NaN	NaN	NaN	NaN	NaN		NaN	NaN	NaN	NaN	NaN		NaN	NaN	NaN	NaN	NaN
75			Q26. How often do you use the following transport modes? Public transport for trips of less than 100 km per one-way		NaN	NaN	NaN	NaN	NaN		0.134593	0.0503109	-0.0996983	0.121871	0.0737001		0.0871359	-0.00147724	-0.0971577	0.0896641	0.0262329		0.146571	0.0515416	-0.100938	0.124179	0.0763764
76			Q27. How often do you use the following transport modes? Public transport for trips of more than 100 km per one-way		NaN	NaN	NaN	NaN	NaN		0.0549314	0.210476	-0.123128	0.0967071	0.0869891		0.00181732	0.136347	-0.12478	0.0537277	0.0315821		0.0975915	0.1894	-0.0986179	0.112347	0.111812
77			Q22. Walking for more than 500 meters per trip.		NaN	NaN	NaN	NaN	NaN		0.0734512	-0.0147616	-0.0218648	0.0846375	0.053137		0.0768881	-0.03701	-0.0067808	0.06114	0.0596404		0.0648542	-0.00349277	-0.0328796	0.0825708	0.0469594
78			Q19. Do you have a monthly pass or an annual travel card for public transport?		NaN	NaN	NaN	NaN	NaN		0.0831177	0.104085	-0.0679848	0.0950684	0.0802552		0.0476302	0.0860013	-0.0630916	0.0697402	0.0477931		0.112979	0.0863751	-0.0529438	0.104567	0.0961001
79			Q13. Do you have a valid driver's license?		NaN	NaN	NaN	NaN	NaN		0.00442304	-0.0323173	0.163776	-0.0355152	0.110689		0.0175065	0.00179281	0.158691	-0.0362299	0.125938		-0.0126625	-0.0217682	0.156092	-0.0441243	0.104512
80			Q16. How difficult is it usually to find a parking space?		NaN	NaN	NaN	NaN	NaN		0.166946	-0.00812799	-0.0604236	0.115043	0.127045		0.126193	-0.0488454	-0.0472446	0.0732619	0.0843743		0.160521	0.00872716	-0.0774667	0.110261	0.120659
81			Q18. In how many accidents were you involved in when driving a vehicle in the last 3 years? Please indicate all accidents, regardless of how they were caused, how severe they were, or where they happened.		NaN	NaN	NaN	NaN	NaN		0.00196258	0.0709565	-0.0359017	-0.0123007	0.0659474		-0.0180702	0.0214379	-0.036319	-0.0338438	0.035716		0.0248457	0.0558983	-0.0221781	-0.0026868	0.0810932
82			Q21. In how many carsharing organizations are you a member?		NaN	NaN	NaN	NaN	NaN		-0.00987856	0.212884	-0.0873323	0.0312778	0.0529922		-0.0269617	0.177343	-0.0783996	0.00761213	0.0360005		0.0382423	0.181059	-0.057229	0.0495386	0.0825683
83	21	Intention to use	Q54. Please indicate when you would use a driverless vehicle. Please select only the most relevant option to you.		0.168815	0.256777	0.137267	0.00410922	-0.19612		NaN	NaN	NaN	NaN	NaN		NaN	NaN	NaN	NaN	NaN		NaN	NaN	NaN	NaN	NaN
84	37	Wish for car-free future	Q94. Please think of your own neighbourhood. Which of the following statements do you agree to most? Please select only one option.		-0.0823238	-0.266486	-0.133713	0.4635	-0.00272692		NaN	NaN	NaN	NaN	NaN		NaN	NaN	NaN	NaN	NaN		NaN	NaN	NaN	NaN	NaN
85	28	Future orientation	Q86. Self-driving vehicles will be a normal part of everyday mobility.		0.309966	0.0438985	0.0244915	0.22993	-0.000243622		NaN	NaN	NaN	NaN	NaN		NaN	NaN	NaN	NaN	NaN		NaN	NaN	NaN	NaN	NaN
86	30	Future orientation	Q85. Self-driving vehicles will mostly be privately owned.		0.119578	0.274997	0.079855	0.120234	-0.0214502		NaN	NaN	NaN	NaN	NaN		NaN	NaN	NaN	NaN	NaN		NaN	NaN	NaN	NaN	NaN
87	29	Future orientation	Q84. Self-driving vehicles will mostly be shared vehicles.		0.162306	0.0436795	0.0960061	0.226751	-0.0269351		NaN	NaN	NaN	NaN	NaN		NaN	NaN	NaN	NaN	NaN		NaN	NaN	NaN	NaN	NaN
88			Which of the following possibilities describe your current residential situation the most?		NaN	NaN	NaN	NaN	NaN		0.102865	0.00952707	0.0464841	0.101199	0.0971803		0.0766141	-0.0386329	0.0429343	0.0660067	0.0638211		0.0790769	0.039858	0.0248604	0.0912782	0.0811014
89			General acceptance score								0.942711	0.094437	0.242872	0.596603	0.664069		0.93597	0.0370456	0.242433	0.570368	0.62754		0.937651	0.203484	0.183463	0.589142	0.646051
90			PCA-1 score (General acceptance)								1	-0.0679171	0.136586	0.453675	0.509047		1	-0.112043	0.133399	0.424568	0.46987		1	0.041071	0.0569306	0.439281	0.477525
91			PCA-2 score (Thrill seeking)								-0.0679171	1	-0.0198204	0.119755	-0.0134221		-0.112043	1	-0.00168909	0.0735071	-0.0716008		0.041071	1	0.0631978	0.17037	0.0552369
92			PCA-3 score (Wanting to be in control manually)								0.136586	-0.0198204	1	0.0631759	0.292379		0.133399	-0.00168909	1	0.0676496	0.300851		0.0569306	0.0631978	1	0.0316843	0.254096
93			PCA-4 score (Supporting a car-free environment)								0.453675	0.119755	0.0631759	1	0.28336		0.424568	0.0735071	0.0676496	1	0.24235		0.439281	0.17037	0.0316843	1	0.265395
94			PCA-5 score (Being comfortable with technology)								0.509047	-0.0134221	0.292379	0.28336	1		0.46987	-0.0716008	0.300851	0.24235	1		0.477525	0.0552369	0.254096	0.265395	1
